# Supplementary material for: Genetic Characterization and Clinical Features of Helicobacter pylori Negative Gastric Mucosa-Associated Lymphoid Tissue Lymphoma
Source: MDPI journal article supplement (doi:10.3390/cancers13122993), 2021-06-15
Supplement: s1 [file s1]

**Supplementary Table 1.** Complete list of mutations detected by next generation sequencing (n=67).

1

| SampleID | Variant.ID          | Gene          | AChange.refGene                            |
|----------|---------------------|---------------|--------------------------------------------|
| HP_GA_3  | chr1:101239997_G>T  | <b>S1PR1</b>  | S1PR1:NM_001400:exon2:c.G1013T:p.G338V     |
| HP_GA_3  | chr1:26766309_A>G   | <b>ARID1A</b> | ARID1A:NM_006015:exon9:c.A2821G:p.I941V    |
| HP_GA_3  | chr12:49030976_C>T  | <b>KMT2D</b>  | KMT2D:NM_003482:exon40:c.G13588A:p.D4530N  |
| HP_GA_17 | chr12:49039223_G>A  | <b>KMT2D</b>  | KMT2D:NM_003482:exon33:c.C8365T:p.R2789W   |
| HP_GA_29 | chr4:105275192_C>T  | <b>TET2</b>   | TET2:NM_001127208:exon11:c.C4682T:p.S1561F |
| HP_GA_4  | chr6:111357108_G>A  | <b>REV3L</b>  | REV3L:NM_002912:exon19:c.C7090T:p.P2364S   |
| HP_GA_24 | chr12:49031272_C>T  | <b>KMT2D</b>  | KMT2D:NM_003482:exon39:c.G13433A:p.R4478Q  |
| HP_GA_19 | chr13:32341069_T>G  | <b>BRCA2</b>  | BRCA2:NM_000059:exon11:c.T6714G:p.D2238E   |
| HP_GA_27 | chr3:46265586_G>A   | <b>CCR3</b>   | CCR3:NM_178329:exon2:c.G428A:p.R143Q       |
| HP_GA_5  | chr6:111367821_A>T  | <b>REV3L</b>  | REV3L:NM_002912:exon15:c.T5967A:p.D1989E   |
| HP_GA_30 | chr9:136502043_C>G  | <b>NOTCH1</b> | NOTCH1:NM_017617:exon29:c.G5430C:p.Q1810H  |
| HP_GA_27 | chr9:136505498_C>A  | <b>NOTCH1</b> | NOTCH1:NM_017617:exon25:c.G4398T:p.Q1466H  |
| HP_GA_19 | chr1:26761013_G>A   | <b>ARID1A</b> | ARID1A:NM_006015:exon5:c.G2078A:p.R693Q    |
| HP_GA_25 | chr17:63929447_T>A  | <b>CD79B</b>  | CD79B:NM_000626:exon5:c.A578T:p.D193V      |
| HP_GA_26 | chr2:240630508_G>A  | <b>GPR35</b>  | GPR35:NM_005301:exon2:c.G556A:p.V186M      |
| HP_GA_12 | chr3:151881106_G>C  | <b>SUCNR1</b> | SUCNR1:NM_033050:exon3:c.G563C:p.S188T     |
| HP_GA_4  | chr7:2945828_T>G    | <b>CARD11</b> | CARD11:NM_032415:exon4:c.A349C:p.T117P     |
| HP_GA_37 | chr7:2945834_A>T    | <b>CARD11</b> | CARD11:NM_032415:exon4:c.T343A:p.F115I     |
| HP_GA_21 | chrX:1466156_G>T    | <b>P2RY8</b>  | P2RY8:NM_178129:exon2:c.C403A:p.R135S      |
| HP_GA_22 | chr11:108256239_C>T | <b>ATM</b>    | ATM:NM_000051:exon14:c.C2149T:p.R717W      |
| HP_GA_7  | chr12:49050580_G>A  | <b>KMT2D</b>  | KMT2D:NM_003482:exon11:c.C3008T:p.P1003L   |
| HP_GA_10 | chr4:105261759_G>A  | <b>TET2</b>   | TET2:NM_001127208:exon8:c.G3955A:p.E1319K  |
| HP_GA_29 | chr5:151063732_T>G  | <b>TNIP1</b>  | TNIP1:NM_006058:exon3:c.A152C:p.E51A       |

|          |                                 |                |                                                          |
|----------|---------------------------------|----------------|----------------------------------------------------------|
| HP_GA_18 | chr6:137879309_G>A              | <b>TNFAIP3</b> | TNFAITNFAIP3:NM_006290:exon7:c.G1864A:p.G622S            |
| HP_GA_17 | chr7:2937980_T>A                | <b>CARD11</b>  | CARD11:NM_032415:exon8:c.A1070T:p.D357V                  |
| HP_GA_3  | chr9:136523780_C>T              | <b>NOTCH1</b>  | NOTCH1:NM_017617:exon3:c.G340A:p.G114R                   |
| HP_GA_22 | chr17:45290495_G>C              | <b>MAP3K14</b> | MAP3K14:NM_003954:exon2:c.C251G:p.A84G                   |
| HP_GA_32 | chr3:183492118_G>A              | <b>KLHL6</b>   | KLHL6:NM_130446:exon7:c.C1675T:p.R559W                   |
| HP_GA_9  | chr6:137879215_C>A              | <b>TNFAIP3</b> | TNFAIP3:NM_006290:exon7:c.C1770A:p.C590X                 |
| HP_GA_28 | chr6:137879215_C>A              | <b>TNFAIP3</b> | TNFAIP3:NM_006290:exon7:c.C1770A:p.C590X                 |
| HP_GA_29 | chr6:137879222_C>T              | <b>TNFAIP3</b> | TNFAIP3:NM_006290:exon7:c.C1777T:p.Q593X                 |
| HP_GA_20 | chr11:108289015_C>T             | <b>ATM</b>     | ATM:NM_000051:exon28:c.C4148T:p.S1383L                   |
| HP_GA_31 | chr12:49039283_C>T              | <b>KMT2D</b>   | KMT2D:NM_003482:exon33:c.G8305A:p.D2769N                 |
| HP_GA_34 | chr12:49040773_G>A              | <b>KMT2D</b>   | KMT2D:NM_003482:exon31:c.C6997T:p.P2333S                 |
| HP_GA_3  | chr2:174460026_G>T              | <b>GPR155</b>  | GPR155:NM_152529:exon10:c.C1623A:p.C541X                 |
| HP_GA_32 | chr3:183555469_A>T              | <b>KLHL6</b>   | KLHL6:NM_130446:exon1:c.T185A:p.L62Q                     |
| HP_GA_21 | chr3:46373183_G>T               | <b>CCR5</b>    | CCR5:NM_000579:exon3:c.G281T:p.W94L                      |
| HP_GA_5  | chr3:46373519_C>T               | <b>CCR5</b>    | CCR5:NM_000579:exon3:c.C617T:p.P206L                     |
| HP_GA_39 | chr4:105272735_C>T              | <b>TET2</b>    | TET2:NM_001127208:exon10:c.C4354T:p.R1452X               |
| HP_GA_9  | chr1:119923937_->GGTCACAG       | <b>NOTCH2</b>  | NOTCH2:NM_024408:exon26:c.4558_4559insCTGTGACC:p.Q1520fs |
| HP_GA_28 | chr1:119923937_->GGTCACAG       | <b>NOTCH2</b>  | NOTCH2:NM_024408:exon26:c.4558_4559insCTGTGACC:p.Q1520fs |
| HP_GA_37 | chr1:26774925_->C               | <b>ARID1A</b>  | ARID1A:NM_006015:exon18:c.4699dupC:p.R1566fs             |
| HP_GA_28 | chr11:118894590_->C             | <b>CXCR5</b>   | CXCR5:NM_001716:exon2:c.1047dupC:p.C349fs                |
| HP_GA_20 | chr11:118894608_GGCGCAGGAGC>-   | <b>CXCR5</b>   | CXCR5:NM_001716:exon2:c.1064_1074del:p.W355fs            |
| HP_GA_28 | chr11:118894626_->T             | <b>CXCR5</b>   | CXCR5:NM_001716:exon2:c.1083dupT:p.S361fs                |
| HP_GA_2  | chr11:118894628_GAGTCA>-        | <b>CXCR5</b>   | CXCR5:NM_001716:exon2:c.1084_1089del:p.362_363del        |
| HP_GA_24 | chr12:49054591_C>A              | <b>KMT2D</b>   | KMT2D:NM_003482:exon3:c.G337T:p.E113X                    |
| HP_GA_32 | chr14:102886230_C>-             | <b>TRAF3</b>   | TRAF3:NM_145725:exon7:c.612delC:p.C204fs                 |
| HP_GA_9  | chr16:3728427_TGCTGCTGCTGTTGC>- | <b>CREBBP</b>  | CREBBP:NM_004380:exon31:c.6606_6620del:p.2202_2207del    |

|          |                                                      |                |                                                       |
|----------|------------------------------------------------------|----------------|-------------------------------------------------------|
| HP_GA_22 | chr16:3780803_AGA>-                                  | <b>CREBBP</b>  | CREBBP:NM_004380:exon8:c.1750_1752del;p.584_584del    |
| HP_GA_19 | chr16:3792073_C>T                                    | <b>CREBBP</b>  | CREBBP:NM_004380:exon5:c.G1238A:p.R413Q               |
| HP_GA_34 | chr16:3793494_G>C                                    | <b>CREBBP</b>  | CREBBP:NM_004380:exon4:c.C1108G:p.R370G               |
| HP_GA_20 | chr16:3850364_GTTA>-                                 | <b>CREBBP</b>  | CREBBP:NM_004380:exon2:c.728_731del;p.L243fs          |
| HP_GA_9  | chr17:45290490_ACTCAG>-                              | <b>MAP3K14</b> | MAP3K14:NM_003954:exon2:c.251_256del;p.84_86del       |
| HP_GA_28 | chr17:45290490_ACTCAG>-                              | <b>MAP3K14</b> | MAP3K14:NM_003954:exon2:c.251_256del;p.84_86del       |
| HP_GA_29 | chr17:7674199_A>C                                    | <b>TP53</b>    | TP53:NM_000546:exon7:c.T764G:p.I255S                  |
| HP_GA_3  | chr17:7674220_C>T                                    | <b>TP53</b>    | TP53:NM_000546:exon7:c.G743A:p.R248Q                  |
| HP_GA_20 | chr19:14390962_G>A                                   | <b>ADGRE5</b>  | ADGRE5:NM_078481:exon4:c.G229A:p.G77R                 |
| HP_GA_17 | chr20:35627313_->T                                   | <b>CPNE1</b>   | CPNE1:NM_152925:exon14:c.1202_1203insA:p.F401fs       |
| HP_GA_2  | chr3:38141208_CACTGTCTGCGACTACACCAACCCCTG>-          | <b>MYD88</b>   | MYD88:NM_002468:exon5:c.852_878del;p.284_293del       |
| HP_GA_25 | chr6:137875023_CTATGATACTCGGGTAGGTTTTTCCCCCTAATTAT>- | <b>TNFAIP3</b> | TNFAIP3:NM_006290:exon3:c.474_486del;p.C158fs         |
| HP_GA_33 | chr6:137875833_->T                                   | <b>TNFAIP3</b> | TNFAIP3:NM_006290:exon4:c.632_633insT:p.S211fs        |
| HP_GA_27 | chr6:137877209_CGTCCAAGGCTGGGACCATGGCA>-             | <b>TNFAIP3</b> | TNFAIP3:NM_006290:exon6:c.939_961del;p.P313fs         |
| HP_GA_27 | chr6:137878680_A>-                                   | <b>TNFAIP3</b> | TNFAIP3:NM_006290:exon7:c.1235delA:p.Q412fs           |
| HP_GA_8  | chr6:137878756_CT>-                                  | <b>TNFAIP3</b> | TNFAIP3:NM_006290:exon7:c.1311_1312del;p.A437fs       |
| HP_GA_37 | chr7:2939887_->TCC                                   | <b>CARD11</b>  | CARD11:NM_032415:exon6:c.725_726insGGA:p.E242delinsEE |
| HP_GA_24 | chr9:136496197_AG>-                                  | <b>NOTCH1</b>  | NOTCH1:NM_017617:exon34:c.7541_7542del;p.P2514fs      |
